1 **Teasing apart the joint effect of demography and natural selection**  
2 **in the birth of a contact zone**

3

4 Lili Li<sup>1\*</sup>, Pascal Milesi<sup>1\*</sup>, Mathieu Tiret<sup>1</sup>, Jun Chen<sup>1,6</sup>, Janek Sendrowski<sup>1</sup>, John Baison<sup>2</sup>, Zhiqiang  
5 Chen<sup>2</sup>, Linghua Zhou<sup>2</sup>, Bo Karlsson<sup>3</sup>, Mats Berlin<sup>4</sup>, Johan Westin<sup>5</sup>, Rosario Garcia-Gil<sup>2</sup>, Harry  
6 Wu<sup>2,7</sup>, Martin Lascoux<sup>1§</sup>

7

8 <sup>1</sup>Program in Plant Ecology and Evolution, Department of Ecology and Genetics, EBC and SciLife  
9 Lab, Uppsala University

10 <sup>2</sup>Umeå Plant Science Centre, Department Forest Genetics and Plant Physiology, Swedish Univer-  
11 sity of Agricultural Sciences, SE-90183 Umeå, Sweden

12 <sup>3</sup>Skogforsk, Ekebo, 2250 SE-268 90 Svalöv, Sweden

13 <sup>4</sup>Skogforsk, Uppsala Science Park, 751 83 Uppsala, Sweden

14 <sup>5</sup>Unit for field-based forest research, Swedish University of Agricultural Sciences, SE-922 91  
15 Vindeln, Sweden

16 <sup>6</sup>College of Life Sciences, Zhejiang University, Hangzhou, Zhejiang 310058, China

17 <sup>7</sup>CSIRO National Collection Research Australia, Black Mountain Laboratory, Canberra, ACT 2601,  
18 Australia

19

20 \*These authors contributed equally to the present study and are listed in alphabetic order.

21 §Corresponding author: Martin Lascoux

22 **Email:** [Martin.Lascoux@ebc.uu.se](mailto:Martin.Lascoux@ebc.uu.se)

23

24

25 **Author Contributions:** ML and PM designed the study; LL, PM, MT, JC and JS analyzed the  
26 data; JB, ZC, LZ, BK, MB, JW, RGG, HW performed experiments or field work and contributed  
27 data; LL, PM, MT and ML drafted the manuscript. All authors read and approved the final version  
28 of the manuscript.

29

30 **Competing Interest Statement:** None

31 **Classification: Major: Biological Sciences, Minor:** Evolution; Plant Biology, Genetics

32

33 **Keywords:** Local adaptation; contact zone; Last Glacial Maximum; natural selection; demogra-  
34 phy

35

36 **This PDF file includes:**

37 Main Text

38 Figures 1 to 3

39 Tables 1 to 1

40 **Abstract**

41 Vast population movements induced by recurrent climatic cycles have shaped the  
42 genetic structure of plant species. This is especially true in Scandinavia that was  
43 repeatedly glaciated. During glacial periods trees were confined to refugia, south  
44 and east of the ice sheet, from which they recolonized Scandinavia as the ice  
45 melted away. This multi-pronged recolonization led to large contact zones in most  
46 species. We leverage large genomic data from 5000 trees to reconstruct the de-  
47 mographic history of Norway spruce (*Picea abies*) and test for the presence of  
48 natural selection during the recolonization process and the establishment of the  
49 contact zone. Sweden is today made up of two large genetic clusters, a southern  
50 one originating from the Baltics and a Northern one originating from Northern Rus-  
51 sia. The contact zone delineating these two clusters closely matches the limit be-  
52 tween two major climatic regions. This suggests that natural selection contributed  
53 to the establishment and the maintenance of the contact zone. To test this hypoth-  
54 esis we first used Approximate Bayesian Computation; an Isolation-with migration  
55 model with genome-wide linked selection fits the data better than a purely neutral  
56 one. Secondly, we identified loci characterized by both extreme allele frequency  
57 differences between geographic regions and association to the variables defining  
58 the climatic zones. These loci, many of which are related to phenology, form clus-  
59 ters present on all linkage groups. Altogether, the current genetic structure reflects  
60 the joint effect of climatic cycles, recolonization and selection on the establishment  
61 of strong local adaptation and contact zones.

62 **247 words**

63

64 **Significance Statement**

65 Understanding how past climatic events, human actions and evolutionary forces  
66 contributed to the present distribution of genetic diversity is crucial to predict their  
67 reaction to the current climate crisis. Vast distribution shifts induced by past envi-  
68 ronmental changes, local ecological processes, natural selection and human trans-  
69 fers contributed to the current distribution of Norway spruce across Northern Eu-  
70 rope. Genome-wide polymorphisms from thousands of individuals show that Scan-  
71 dinavia was recolonized after the Last Glacial from both south and north. This two-  
72 pronged recolonization established a contact zone between two genetic clusters  
73 that matches the limit between two major climate zones. The contact zone is  
74 shaped and maintained by natural selection on a large number of loci that form  
75 blocks of co-adapted loci spread genome-wide.

76 **120 words**

77

78 **Main Text**

79

80 **Introduction**

81

82 All natural populations are structured to varying degrees and more than ever pop-  
83 ulation genetic structure matters (1). It matters for a large range of issues: popula-  
84 tion structure is intrinsically related to speciation and local adaptation; it conditions  
85 the response of species to environmental changes (e.g. climate change or the oc-  
86 currence of new diseases) and it severely limits our ability to associate genetic  
87 polymorphism to phenotypic variation or environmental factors using genome-wide  
88 approaches. Population structure, and more generally demography, also hampers  
89 efforts to detect genomic signatures of natural selection and recent studies on hu-  
90 man height have shown that rather fine-scale structure, if not accounted for, can  
91 lead to wrong inferences on past selection (1,2). There is therefore a strong incen-  
92 tive to develop methods to capture fine-scaled population genetic structure and  
93 thereby strengthens inferences on the relative parts played by past demography  
94 and selection in the evolution of species. So, how far have we gone in this respect?  
95 Undoubtedly, the availability of genome-wide polymorphisms has vastly enhanced  
96 our ability to describe population genetic structure. Yet capturing fine-scale popu-  
97 lation genetic structure and making sense of it still remains a major challenge. In  
98 part, the difficulty arises from the fact that genetic diversity is distributed both dis-  
99 cretely and continuously (3,4). This dual nature of population genetic structure re-  
100 flects the plurality of processes that shape population structure: vast and complex  
101 population movements in response to past climatic changes, gene flow among  
102 populations, and sometimes even between species, local adaptation and, in many  
103 plant and animal species, human-mediated individual transfers.

104 All the aforementioned factors have come into play in the history of many  
105 plant species. Here we shall focus on one of the most common boreal species,  
106 Norway spruce (*Picea abies* (L.) H. Karst)) and more specifically on Scandinavian  
107 populations. Since the seminal study of Lagercrantz and Ryman (5), a large num-  
108 ber of studies have outlined the most salient features of the demographic history  
109 of Norway spruce (6-16). Basically, as already found by (5), current populations  
110 emerged from three main glacial refugia located in the Alps, in the Carpathians

111 and in the Russian plains. This is, of course, a very rough outline and further stud-  
112 ies have added more than one twist to it. In particular, recent studies indicated that  
113 these main lineages did not evolve independently but instead created many con-  
114 tact zones (8). The nature of these contact zones remains to be elucidated: they  
115 could simply be a reflection of past distribution shifts, correspond to ecological  
116 zones and be associated to local adaptation, or be the result of both processes. At  
117 a larger phylogenetic scale, Siberian spruce (*Picea obovata*) has a major influence  
118 in the northern range of *P. abies* with a large introgression zone starting in the  
119 Urals and extending quite far westwards (8,9,14). Introgression from *P. obovata*  
120 into *P. abies* is lopsided with a much larger contribution at high latitudes (~65°N  
121 and above) than at intermediate ones (~60°N) (8). The structure of the vast hybrid  
122 zone between the two species could, at least in part, be due to differences in eco-  
123 logical requirements between the two parental species (17). Second, in more re-  
124 stricted geographical areas, recent introductions have also contributed significantly  
125 to the genetic composition of local populations. The Swedish breeding program  
126 was established by selecting trees with superior phenotypes (aka “plus trees”) in  
127 natural stands across the whole country. Targeted genome sequencing of the in-  
128 dividuals composing the southern part of the breeding program and of individuals  
129 sampled across the natural range of *P. abies* revealed that a large proportion of  
130 these “plus trees” were recent introductions originating from most parts of the nat-  
131 ural range (8). Third, the pattern of differentiation at genotypic, phenotypic, and  
132 environmental variables at the site of origin of the trees were highly correlated in-  
133 dicating a strong pattern of local adaptation (18), as often observed in forest trees  
134 (19). For example, in both Norway and Siberian spruce, Chen *et al.* (7,20) detected  
135 strong latitudinal clines in growth cessation and were able to associate those to a  
136 major candidate gene for photoperiodic response, *FTL2*, and its pattern of expres-  
137 sion. Because these populations are recent these results suggest that local adap-  
138 tation can be established very rapidly. These initial studies were based on a hand-  
139 ful of candidate genes but more recent studies relying on a much larger number of  
140 markers (e.g.,18,21) suggest that quantitative traits and phenology related traits  
141 have a polygenic inheritance with loci involved in local adaptation distributed

142 across the genome. It is, however, still unclear whether adaptive genes are ran-  
143 domly distributed or clustered in some specific regions of the genome. The latter  
144 would, for instance, be expected when two populations that are under stabilizing  
145 selection for different optima are linked by gene flow as is often the case in forest  
146 trees (22,23).

147 In the present study we sequenced all individuals from the base population  
148 of the Swedish *P. abies* breeding program using exome capture (4769 individuals,  
149 >500,000 SNPs), generating an unprecedented large and dense sampling along a  
150 latitudinal gradient ranging from ~55°N to ~67°N. It allowed us to analyze popula-  
151 tion genetic structure with a very high resolution. More specifically, we were able  
152 to test for pattern of isolation-by-distance, identify barriers to gene flow and test  
153 whether those reflect physical or environmental barriers or simply historical contin-  
154 gencies. We show that Swedish populations of Norway spruce are divided into two  
155 main genetic clusters that closely match the two main climatic regions of the coun-  
156 try. Coalescent simulations and Approximate Bayesian Computation allowed the  
157 rejection of a purely neutral divergence model between the two main clusters. Fur-  
158 thermore, genome scans indicate that clusters of loci distributed across the 12  
159 linkage groups correspond to areas of high genetic differentiation and are associ-  
160 ated to environmental variables. The current distribution of genetic diversity in Nor-  
161 way spruce across Sweden therefore appears to be the result of both demographic  
162 processes and local adaptation.

163

## 164 **Results**

165

166 We first investigated global population structure using the whole dataset  
167 which comprises 4607 trees from the base population of the Norway spruce breed-  
168 ing program and 162 trees collected across the natural range of *P. abies* and *P.*  
169 *obovata* (Fig. 1A and Supplementary file 1). Both UMAP (24) and ADMIXTURE  
170 (25) retrieved three main domains, Boreal, Carpathians and the Alps, and clusters  
171 resulting from admixture between these three domains: Central Europe, Russian-  
172 Baltics and Northern Poland (Fig. 1B, C and S1 to S2 in SI Appendix). Sweden is  
173 itself divided into two main genetics clusters, one including southern and central

174 Sweden (CSE) and the other one the northern part of the country (NFE) (Fig. 1 A-  
175 C). Many trees in southern Sweden also correspond to recent introductions. All  
176 this is concordant with (8) and (21). Despite their current geographical closeness,  
177 the CSE and NFE clusters are divergent and CSE is more closely related to the  
178 Russia-Baltics cluster than to NFE ( $F_{ST} = 0.009$  and  $0.018$ , respectively, SI Appen-  
179 dix Tab. S1). In addition, the large discrepancy in ancestry components found be-  
180 tween two putatively hybrid Russian populations located at the same longitude but  
181 at different latitudes support a larger contribution of *P. obovata* to NFE cluster than  
182 to CSE (Fig. 1B and C). This general pattern is consistent with a recolonization of  
183 the Scandinavian peninsula from refugia with different genetic components and  
184 through two different routes, a Northern one and a Southern one. To study more  
185 finely the genetic structure of the contact zone and identify the evolutionary forces  
186 that shaped it, we focused in the rest of the study on the subset of trees that were  
187 native to Sweden and belonged to the CSE (N = 974) and the NFE (N = 784)  
188 clusters.

189

190 Both UMAP and ADMIXTURE implicitly aim to detect discrete genetic clus-  
191 ters. However, Norway spruce tends to be continuously distributed and population  
192 structure is the result of both isolation-by-distance and discontinuities. To account  
193 for this and identify barriers to gene flow, we first used the software *conStruct* (3)  
194 that considers different levels of population genetic structure: layers correspond to  
195 clusters in ADMIXTURE but isolation by distance is considered within layers. Inde-  
196 pendently of the number of layers considered, a model including isolation-by-dis-  
197 tance within layers predicts the genetic variation pattern better than a non-spatial  
198 model (SI Appendix Fig. S3). The lowest cross-validation error (five-fold) was  
199 found for three layers (SI Appendix Fig. S3) but, in line with the ADMIXTURE results,  
200 two ancestry components explained most of the genetic variation and distin-  
201 guished southern trees from northern ones (Fig. 1C). The contact zone between  
202 these two main clusters occurred between 60°N and 63°N (Fig. 2A). Contributions  
203 from the southern cluster into the northern one can be detected at latitudes as high  
204 as 66°N while the northern cluster barely contributed to the populations outside of

205 the contact zone. Finally, populations from high latitudes (close to 67°N) also pre-  
206 sented a specific ancestry component (Fig. 2A). Based on ADMIXTURE results  
207 this ancestry component probably represents more recent introgression from *P.*  
208 *obovata* into the northernmost *P. abies* populations (Fig. 1C). To visualize the var-  
209 iation in effective migration rate across Sweden and detect barriers to gene flow  
210 we then fitted the data to a model of isolation-by-distance and estimated effective  
211 migration surfaces (EEMS, (26)). The resulting pattern is complex but regions with  
212 low effective migration rate (brown areas), correspond to the contact zone already  
213 detected by *conStruct* and to mountainous regions in the north. North-South barri-  
214 ers, as the one along the west coast, are likely artifacts due to the difficulty of  
215 EEMS to account for anisotropy (26) (Fig. 2B). To compare gene flow along lati-  
216 tude and longitude we quantified the IBD by regressing a function of pairwise  $F_{ST}$ ,  
217  $(F_{ST} / (1 - F_{ST}))$ , over the logarithm of distance between populations. According to  
218 (27), the inverse of the slope of the regression provides an indirect estimate of  
219 dispersal. First, considering all pairs of populations we detected a pattern of IBD,  
220 with an estimated dispersal of  $209 \pm 33$  individuals (SI Appendix Fig. S4). But, the  
221 IBD was much more pronounced along a latitudinal gradient ( $228 \pm 33$ ), than along  
222 a longitudinal gradient ( $680 \pm 187$ ).

223 To investigate whether ecological barriers to gene flow contributed to the  
224 establishment of the contact zone we analyzed environmental variation across  
225 Sweden. Three climatic zones were delineated (Fig. 2C, see Online methods §  
226 “*Abiotic environment characterization and climatic zones definition*”): the two main  
227 ones separate the northern part from the southern part of the country and the dif-  
228 ferentiation is mainly explained by temperature-related variables (annual mean  
229 temperature, minimum or average temperature of the coldest months, seasonal-  
230 ity). The third climatic zone corresponds to the mountainous area and the west  
231 coast and is characterized by higher precipitations than the two other climatic  
232 zones (Fig. 2C and SI Appendix S5).

233 The genetic contact zone between the Northern (NFE) and the Southern  
234 (CSE) clusters almost perfectly overlap the transition between the Northern and  
235 Southern climatic zones (Fig. 2C). Based on ancestry components from



236 ADMIXTURE ( $K = 6$ ) we computed a hybridization index,  $h_i$ , which varied from 0,  
237 (full CSE), to one, (full NFE). While most of the CSE ( $h_i \leq 0.33$ ) or NFE ( $h_i \geq 0.66$ )  
238 trees were restricted to the Southern or the Northern climatic zone, respectively  
239 (Wilcoxon's rank-sum test,  $W > 7 \times 10^{-5}$ ;  $p < 0.001$ ), the hybrids ( $0.33 < h_i < 0.66$ )  
240 were located on the transition zone and evenly distributed between the two climatic  
241 zones ( $W = 789$ ;  $p = 0.18$ , Fig. 2C). Such a match between the main environmental  
242 zones and the genetic structure strongly suggests that natural selection contrib-  
243 uted to the creation and maintenance of the contact zone between the two genetics  
244 clusters.

245 To test whether natural selection contributed to the establishment and  
246 maintenance of the contact zone we simulated different coalescent isolation with  
247 migration scenarios and calculated their posterior probabilities with an Approximate  
248 Bayesian Computation (ABC) approach implemented in the program *DILS*  
249 (28). Briefly, in the presence of linked selection one expects a larger variance in  
250 effective population size,  $N_e$ , among loci than under a strictly isolation with migra-  
251 tion model. In order to measure the effect of hybridization on demographic scenario  
252 inferences, we created three samples of 20 individuals (10 from NFE and 10 from  
253 CSE) varying in their distance to the contact zone (far, intermediate, or close). In  
254 all three cases the most likely model was one with linked selection, with posterior  
255 probabilities of 71.24%, 93.39%, and 87.94% for far, intermediate and close, re-  
256 spectively (Tab. 1). This suggests that linked selection occurred over the entire  
257 range of each climate zone. This result was further confirmed by additional forward  
258 simulations (SI Appendix Section 2).

259 To identify genomic signatures of local adaptation associated with the  
260 contact zone, we then (i) scanned our genomic data for loci with extreme allele  
261 frequency differences between geographic regions using *Bayenv2* ( $X^T X$  score)  
262 (29) and *pcAdapt* (30) and (ii) ran genotype-environment associations (GEA) using  
263 *Bayenv2* and *lfmm2* (31) on a subset of 142,765 SNPs with  $MAF > 0.05$ . *Bayenv2*  
264 is population based while *pcAdapt* and *lfmm2* are individual-based. Genome scans  
265 identified 440 and 990 SNPs showing extreme allele frequency differences  
266 between geographic regions, using *pcAdapt* or  $X^T X$  statistic, respectively (32 %

267 overlap at the gene level). With GEA, a total of 1616 (*bayenv2*) and 1298 (*flmm2*)  
268 SNPs were associated to at least one of the 24 bioclimatic variables (21% overlap  
269 at the gene level). The number of significant associations per bioclimatic variable  
270 was correlated between the two analyses (Spearman's  $\rho = 0.53$ ,  $S = 1070$ ,  $p <$   
271  $0.01$ ) (SI Appendix Tab. S2). Most of the significant associations were with the  
272 climatic variables that contributed the most to the discrimination of the two main  
273 climatic zones (Spearman's  $\rho = 0.76$ ,  $S = 229.8$ ,  $p < 0.001$  and  $\rho = 0.65$ ,  $S =$   
274  $350.15$ ,  $p < 0.01$ , respectively for *flmm2* and *bayenv2*).

275         The genes putatively involved in local adaptation were tested for gene on-  
276 tology term enrichment. They were first grouped into four main categories depend-  
277 ing on whether they were (i) differentiation outliers or (ii) associated to tempera-  
278 ture-related, (iii) precipitation-related or (iv) seasonality-related climate variables.  
279 Enrichment was significant for gene ontology terms associated to biological pro-  
280 cesses related to environmental stimulus detection, metabolic pathways, growth  
281 and morphogenesis regulation, as well as biotic interactions (SI Appendix, Fig. S6).  
282 Since GO term annotation for the *P. abies* genome is incomplete we also adopted  
283 an *ad hoc* approach, specifically focusing on functions of interest, namely, re-  
284 sponse to photoperiod, cold or abiotic stimuli, growth, flowering and circadian  
285 clock. In total we identified 134 candidate SNPs located within or in the vicinity of  
286 81 unique genes involved in these functions. We used a heatmap to illustrate how  
287 allele frequencies at these SNPs changed across populations. Populations clus-  
288 tered according to latitude (SI Appendix, Fig. S7) and this clustering was mostly  
289 driven by genes associated to the circadian clock and therefore to phenology and  
290 growth rhythm: *XAP5 time keeper* (Spearman's  $\rho = 0.70$ ), *flowering-time-like loci*  
291 (*FTL*,  $\rho = 0.59$ ), *early flowering loci 3* (*EFL3*,  $\rho = 0.92$ ), *early flowering loci 3*  
292 *high* (*EFL3-high*,  $\rho = 0.91$ ), *sensitivity to red light reduced 1* (*SSR1*,  $\rho = 0.78$ )  
293 and *gigantea* ( $\rho = 0.76$ ), (Fig 3A).

294  
295         In spite of the high fragmentation of the Norway spruce reference genome  
296 (32), we successfully mapped 89,940 SNPs onto the Norway spruce genetic map  
297 (33). Genes putatively involved in local adaptation clustered in a limited number of

298 genomic regions spread across the genome (four genes on average per regions,  
299 maximum 14 for *bayenv2* analysis and six on average and maximum 22 for *lmm2*),  
300 with one or several clusters on most linkage groups (Fig. 3B and C, SI Appendix,  
301 Section 3). All candidate regions with extreme allele frequency differences be-  
302 tween geographic regions were associated to at least two environmental variables,  
303 suggesting a direct or indirect causal relationship between high genetic differenti-  
304 ation and environmental factors. Regions enriched for candidate genes were more  
305 often associated to temperature-related variables (on average  $4.5 \pm 3.6$  regions  
306 across the two GEA analyses, the maximum being nine for *temperature annual*  
307 *range*) than to precipitation-related ones ( $0.94 \pm 1.1$ , maximum being three for *pre-*  
308 *cipitation of driest quarter*). The climatic variables that contributed the most to the  
309 discrimination of the two main climatic zones were also those for which we de-  
310 tected the highest number of genomic regions enriched for candidate genes  
311 (Spearman's  $\rho = 0.65$ ;  $S = 469.32$ ;  $df = 18$ ;  $p = 0.002$  for *bayenv2*). Similar results  
312 were obtained with *lmm2*, the number of candidate genomic regions per variable  
313 being highly correlated between the two analyses ( $\rho = 0.63$ ,  $S = 853$ ,  $p < 0.001$   
314 and Figure 3C). Genomic regions associated to local adaptation were found across  
315 all linkage groups but formed large clusters on individual chromosomes. Taken  
316 together, these results and those of the ABC analysis strongly support a significant  
317 contribution of natural selection to the establishment and maintenance of the con-  
318 tact zone.

319

## 320 **Discussion**

321

322 Contact zones are a rich source of information on the interplay between demogra-  
323 phy and selection in shaping the genetic structure of species (34). Leveraging ge-  
324 nomic data from almost 5000 trees sampled across Sweden and the natural range  
325 of Norway spruce, we reconstructed the origin of the contact zone separating the  
326 south and the north of Scandinavia and showed that natural selection acting on  
327 gene clusters dispersed across the whole genome contributed to the differentiation  
328 between the two main genetic clusters. Given that Norway spruce has been pre-  
329 sent in Scandinavia a rather limited number of generations (35), this is an important

330 result with respect to climate change since, unless trees were pre-adapted before  
331 invading Scandinavia, it suggests rapid local adaptation.

332

### 333 **A recent contact zone**

334

335 The general clustering is congruent with what was observed in earlier stud-  
336 ies using smaller sample sizes (8) and different markers (14). According to these  
337 population genetics studies and the paleo-ecological record (pollen fossil data but  
338 also macrofossils) (35-39), current European populations of *P. abies* originate from  
339 at least three main ancient refugia located in the Alps, in the Carpathians and in  
340 the Russian and Western Siberia Plains. Introgression from Siberian spruce (*P.*  
341 *obovata*) also contributed significantly to the latter, especially at high latitudes (14).  
342 What our data show is that these three lineages did not evolve independently but  
343 rather entered into contact at many points. For example, as apparent from the Ad-  
344 mixture analysis, both Northern Poland and the Russian-Baltic domain, are three  
345 ways admixture, with a major contribution from the Carpathians and more limited  
346 contributions from the Alps and *P. obovata*.

347 The recolonization of Northern Europe by *P. abies* started relatively late and  
348 spruce migration rates for Fennoscandia varied between 200 and 500 m.year<sup>-1</sup>  
349 (38). Our data supports the existence of two routes of recolonization of Scandina-  
350 via, both from east to west, but one entering Scandinavia from the north and mov-  
351 ing southward and one entering Scandinavia at a lower latitude and moving both  
352 northward and southward (35). The two routes joined between 60°N and 63°N and  
353 created an admixture zone that was identified in the present study. Fossil data  
354 indicate that trees entered Scandinavia around 13,000-12,000 years ago from the  
355 South and 4,000-3,000 years ago from the North (39). The recolonization of Scan-  
356 dinavia by Norway spruce occurred in two phases: a first phase during which small  
357 outposts were established and, later on, a second phase when dispersal from  
358 those and from a larger front started (39). If their average migration rate was 300  
359 m/year, trees should have reached the current location of the contact zone after  
360 around 3300 years and 2000 years, respectively. So, the contact zone would have

361 been created some 2000 years ago, or, assuming a generation time of around 50  
362 years, some 40 generations ago. The pollen fossil record suggests a somewhat  
363 lower migration rate and the fronts reaching central Sweden some 3000 years ago,  
364 so around 60 generations ago. Of course, these are approximate dates and we do  
365 not expect the northwards and southwards migrations to progress at similar speed  
366 since it is a well-established fact that Norway spruce can easily be transferred  
367 some 3-4 degrees of latitude north without much loss in growth but that a south-  
368 wards move is generally much less successful (40). We indeed observed an asym-  
369 metry, with the southern cluster contributing to the northern one as high as latitudes  
370 66°N while the northern cluster contribution to the southern one was much more  
371 limited. In any case, given that gene flow is important in Norway spruce, this implies  
372 that one would likely have expected the contact zone to have started to be eroded  
373 by gene flow unless it were maintained by selection.

374         These two recolonization routes are not unique to spruce and are observed  
375 in others species, for example, humans, where they are well established (41,42).  
376 The resulting admixture zone coincides with a postulated zone of postglacial con-  
377 tact for many plant and animal species (12,43). A similar contact zone is for in-  
378 stance observed in *Populus tremula L.* (44), brown bears (45) or rodents (46). In  
379 all these organisms, the contact zone has been initially interpreted as the meeting  
380 point between the two main lineages that recolonized Scandinavia after the Last  
381 Glacial Maximum (about 25 Kya). In *Populus tremula L.*, though, the contact zone  
382 corresponds to a sharp change in allele frequency at the FTL gene that is involved  
383 in the control of budset (47).

384

385         In addition to the main contact zone, in the *conStruct* analysis, populations  
386 located north of 62°N contain an ancestral component that was specific to those  
387 populations (Fig. 2A, red component). A similar result was obtained by (48) who  
388 analyzed the genetic diversity at 15 SSR loci in nine of the breeding populations  
389 from northern Sweden. The two northernmost of these nine populations formed a  
390 separate cluster in a PCA and both populations presented signs of bottlenecks  
391 (48). Those populations are characterized by a higher contribution from *P.*

392 *obovata*. (11) also observed that trees collected from Northern Fennoscandia and  
393 Russia-Urals clustered in a Neighbor-joining tree based on seven SSR loci. Thus,  
394 this genetic group reflects how far west *P. obovata* genetic influence was felt, an  
395 influence that might have been reinforced locally by bottlenecks during the recolo-  
396 nization process (14). This westward recolonization pattern at high latitudes is not  
397 specific to the *P. abies* - *P. obovata* species pair. A similar situation is observed  
398 between *Larix sibirica* and *Larix gmelinii* with introgression of mtDNA from the local  
399 species in the west, *L. sibirica*, into the invading species from the East, *L. gmelinii*  
400 (49-51). This trend does not preclude migration in the opposite direction. For ex-  
401 ample, *Pinus sylvestris* apparently dispersed primary from western Europe (52).

402 Finally, pollen analysis and simulations supported a moving front recolonization  
403 of Scandinavia rather than population expansion from local refugia  
404 (35,38,53). Putative local refugia have been found in mountainous area of central  
405 Sweden (54) and might have had a local impact but the fit to an isolation by dis-  
406 tance pattern, together with the importance of the contribution of *P. obovata*, would  
407 rather argue for a recolonization from populations located outside of the main gla-  
408 ciated areas. Also, these refugial populations are made of small trees that repro-  
409 duce mainly asexually (54) and it is highly doubtful that they could have contributed  
410 massively to surrounding populations. More generally, comparison between *Picea*  
411 and *Larix* in Eastern Siberia suggests that *Picea* biology (relatively heavy seeds,  
412 low genetic diversity in survival pockets) might explain why *Larix* and not *Picea*  
413 was capable of population expansion from small, scattered refugia (55).

414

#### 415 **Polygenic architecture of local adaptation along the contact zone**

416

417 We have so far discussed the data in term of demographic events. However,  
418 the major contact zone that was observed in Scandinavia (i) corresponds to a dis-  
419 continuity in bioclimatic factors, (ii) is better explained by a model incorporating  
420 linked selection than by a purely neutral one and (iii) is accompanied by a large  
421 number of genomic areas containing clusters of genes characterized by high ge-  
422 netic differentiation and association with climatic variables changing across latitude

423 (e.g. photoperiod, temperature-related climatic variables). While this is not the first  
424 study indicating the presence of selection and adaptive cline in forest trees along  
425 a latitudinal gradient this is the first one that demonstrates the genome wide impact  
426 of local adaptation. The observed pattern is expected under polygenic adaptation  
427 for different optima when populations are linked by gene flow (22,23) and could be  
428 further reinforced or even caused by structural rearrangements that allow the  
429 spread of co-adapted alleles. Unfortunately, the current state of the genome as-  
430 sembly (> 1.5 M scaffolds) does not allow us to investigate further this hypothesis.  
431 However, as the largest region includes up to 22 genes carried by different scaf-  
432 folds, we can expect that some regions enriched for candidate genes are structural  
433 variants that can further limit gene-flow between the northern and southern clus-  
434 ters.

435

436 A large number of genes were significantly associated to environmental var-  
437 iables and differentiation outliers; 205 unique genes carried at least one significant  
438 SNPs associated to environmental variables and 91 were outliers in genome  
439 scans. In line with (18) and (21), this suggests a high degree of polygenicity of local  
440 adaptation in Norway spruce. Because of the confounded effects of population  
441 structure and of the main environmental gradient, these numbers are likely under-  
442 estimates (18). The more pronounced pattern of isolation by distance at these loci  
443 than at all loci considered jointly strongly suggests that they contribute to local  
444 adaptation. This is further supported by the involvement of many of the identified  
445 candidate genes in the control of the circadian clock (*XAP5*, *FTL*, *EFL-3*, *EFL-3*  
446 *high*, *Gigantea*, *CEN1*, *SRR1*, *LHY*) and therefore in phenology and growth  
447 rhythm. Interestingly three important genes for phenology, *FTL*, *EFL-3* and *Gigan-*  
448 *tea*, are located close by on linkage group 8 (Fig. 3C). This co-localization could  
449 have been favored by the strong selection pressure on juvenile trees exerted by  
450 frost in late-spring and early-fall (56). In any case, selection on phenology will in-  
451 duce differences in reproductive period that could partly explain the maintenance  
452 of the contact zone by limiting the gene-flow between the two clusters.

453

454           Considering, the overall low population genetic differentiation together with  
455 the relatively short time spent by trees in Scandinavia the establishment of such a  
456 strong clinal gradient would seem to imply a rather strong selection pressure, even  
457 at individual loci. Assuming that i) local refugia did not contribute significantly to  
458 the recolonization of Scandinavia, ii) Norway spruce entered Scandinavia around  
459 10,000-12,000 cal. BP and reached central Sweden around 3,000 cal. BP (11,39)  
460 and iii) considering a generation time of about 50 years implies that the observed  
461 gradient at adaptive loci over Sweden was established in around 150-200 genera-  
462 tions. However, it cannot be ruled out that pre-adapted loci also contributed to local  
463 adaptation in newly-colonized areas. As trees from the two main clusters originate  
464 from similar latitudes than the ones found today in Scandinavia, a certain level of  
465 pre-adaptation seems likely. Additional samples from northwestern Russia and  
466 from the Baltics would be necessary to test this hypothesis.

467

#### 468 **Practical implications**

469

470           The genetic structure of the breeding population is important for the man-  
471 agement of its genetic resources, for genome-wide association studies and when  
472 establishing training sets for genomic selection (57). All our analyses indicate that  
473 the individuals used to establish the current breeding population belong to at least  
474 seven main genetic clusters. Southern Sweden is particularly complex due to the  
475 presence of a large fraction of recent introductions (8) but central Sweden is more  
476 homogeneous (CSE) and the northern part of the country consists of two clusters.  
477 Our data therefore suggest that at least three training sets may be sufficient to  
478 account for most population genetic structure. Importantly, our results also indicate  
479 that the current contact zone is maintained by natural selection and will therefore  
480 change as the climate does. Three main scenarios for the reaction of Scandinavian  
481 population under rapid climate change seem plausible. First, trees from the north-  
482 ern cluster (NFE) are progressively going to be introgressed with genes from the  
483 southern cluster as the latter move northwards and the contact zone will progres-  
484 sively disappear. Second, barriers to gene flow are strong enough between the



485 two clusters for the contact zone to persist and shift northwards. Third, assuming  
486 that growth traits are a good proxy for fitness, global change will advantage popu-  
487 lations with more southern origins, for instance favoring trees with an Alpine or  
488 Carpathian genetic background and those will progressively replace existing pop-  
489 ulations. Given that (18) showed that, at least in the southern and central parts of  
490 Sweden, trees with an Alpine or a Carpathian origin outperformed the trees from  
491 local provenance for growth traits, this may well occur. This evolution of the contact  
492 zone will need to be monitored and incorporated into future genotype-by-climate  
493 zone interaction studies for optimizing the delineation of breeding zones, some-  
494 thing that, to the best of our knowledge, has not yet been implemented in forest  
495 tree breeding.

496

497 At any rate, predicting the future evolution of natural populations, for in-  
498 stance for conservation and breeding, is and will remain a complex task, even more  
499 so for species such as Norway spruce that are tightly associated to human activity.  
500 The detection of adaptive loci that are associated with phenotypic traits and/or en-  
501 vironment will not be sufficient to predict future adaptation under climate change  
502 scenarios without a deep knowledge of both global and local genetic diversity and  
503 how this diversity translates into fitness under various environments. First, intro-  
504 gression from closely related species (or from individuals from outside of the focal  
505 range) plays a role in shaping genetic diversity and response to environment. Sec-  
506 ond, adaptation to a highly dimensional environment requires a high degree of  
507 polygenicity. It is therefore intrinsically challenging to extrapolate both genotype-  
508 phenotype and genotype-environment relationships under various scenarios in-  
509 volving either demographic or environmental changes. This would require exten-  
510 sive studies, at both local and global geographical scales, repeated over time and  
511 with an exhaustive sampling of genetic diversity in the target species but also in  
512 species with whom it can hybridize.

513

514

515

## 516 **Materials and Methods**

517

518 **Sample collection:** The study was based on 4769 spruce trees, originating mainly  
519 from the Swedish Norway spruce (*P. abies*) breeding (Figure 1). Among them, 162  
520 individuals were collected in natural populations across the Norway spruce natural  
521 distribution range (8). The remaining trees (4607) were “plus” trees (trees of out-  
522 standing phenotype) sampled in Skogforsk (The Forestry Research Institute of  
523 Sweden) plantations across Sweden. These trees were genotyped ((8), BioProject  
524 PRJNA511374 and (21), BioProject PRJNA731384) using an exome capture tar-  
525 get re-sequencing strategy (40,018 diploid 120bp-length probes designed to cap-  
526 ture 26,219 *P. abies* genes, (58)).

527 **Single Nucleotide Polymorphism calling:** Raw reads were mapped to the *P.*  
528 *abies* genome reference v1.0 (31) and single nucleotide polymorphisms (SNPs)  
529 were identified using HaplotypeCaller v.3.6 (59) and quality filtered. Individuals  
530 with more than 50% missing data were also removed (N = 282). The filtered da-  
531 taset included 4508 individuals and 504,110 SNPs. Those SNPs were annotated  
532 based on the most recent genome annotation available for *P. abies* (v1.0,  
533 <http://congenie.org/>).

534 **Population structure and genotype assignment:** For population structure anal-  
535 yses, sites in high linkage disequilibrium ( $r^2 > 0.2$ ) as well as singletons were re-  
536 moved using PLINK v.1.9 (60). Among the remaining SNPs, 155,211 putatively  
537 neutral SNPs (i.e. within introns and intergenic regions) were kept for demographic  
538 analyses. Population structure was first characterized using a principal component  
539 analysis (EIGENSOFT, v.7.2.0 with default parameters,  
540 <https://github.com/DreichLab/EIG>, 61). Trees with unknown geographical origin  
541 assigned to a genetic cluster using Random Forest classification as in (8). We also  
542 analyzed population structure with ADMIXTURE v1.3 (25) and calculated pairwise  
543 fixation indices (Hudson’s estimator of  $F_{ST}$ , 62) between *P. obovata*, admixed *P.*  
544 *abies* x *P. obovata* populations and the *P. abies* genetic clusters defined through  
545 the UMAP analysis.

546 **Spatialized analyses of genetic variation:** For the following analyses, only trees  
547 that were of confirmed Swedish origin (base on genetic clustering) and with known

548 geographic coordinates were considered ( $N = 1758$ ). To consider both discrete  
549 clusters and continuous distribution of the genetic variation of Norway spruce  
550 across Sweden, we first used the *conStruct* software v. 1.03 (3) that combines  
551 model-based clustering algorithms with an isolation by distance model. To identify  
552 corridors or barriers to gene flow, we used EEMS software (v. 0.0.9000, 26) and  
553 we quantified the pattern of isolation by distance by regressing a function of  $F_{ST}$   
554 (27) over the logarithm of the distance between pairs of populations.

555 **The contribution of linked selection to the contact zone:** In order to test  
556 whether linked selection contributed to the establishment and maintenance of the  
557 contact zone, we used the program DILS (28). Briefly, DILS implements an Ap-  
558 proximate Bayesian Analysis to compare two-population demographic models and  
559 identifies the most likely demographic scenario with and without linked selection.  
560 Considering that distance to the contact zone might influence demographic infer-  
561 ences (e.g., hybrids have different history than pure individuals), we created three  
562 different datasets as inputs for *DILS* depending on the distance to the contact zone.

563 **Testing for local adaptation:** First, to assess whether the contact zone between  
564 the main genetic clusters corresponded to a shift in abiotic conditions across Swe-  
565 den, we defined climatic zones based on 19 bioclimatic records (Chelsa database  
566 v1.2, <http://chelsa-climate.org/>, 30 arc-second resolution). Different approaches  
567 were used to test for the presence of local adaptation at the genomic level and to  
568 detect association between genomic polymorphisms and environmental variables.  
569 To detect genetic differentiation outliers we used the *Bayenv2* software (29,63)  
570 and “*pcadapt*” v4.3.2 R package (30,64). To detect Genotype-environment asso-  
571 ciations we used “*Bayenv2*” and “*lfmm2*” (31). The same 19 Chelsa bioclimatic  
572 variables as those used to define the climatic zone as well as derived combination  
573 of those were used for each tree location.

574 **Candidate genes putative functions and genetic mapping:** Gene ontology  
575 (GO) enrichment was performed using the ‘topGO’ R package (v2.44.0; (65)).  
576 About 60 % of all SNPs were successfully positioned onto the *P. abies* consensus  
577 genetic map (32). We developed a new approach to identify regions enriched for  
578 outliers (either low  $p$ -values in *pcAdapt*, and *lfmm2* analyses or high Bayes factor

579 for *Bayenv2*). The method (66) is described in *online methods* and freely accessi-  
580 ble at <https://github.com/milesilab/peakdetection>.

581

582

583

## Acknowledgments

584

585 We are grateful to Luis Leal and Linus Söderquist for comments on early versions  
586 of the manuscript and to Camille Roux for help with running DILS. This project is  
587 supported by the Swedish Foundation for Strategic Research (SSF), grant number  
588 RBP14-0040. MT was supported by the EU H2020 project, B4EST. The computa-  
589 tion and data handling were provided by the Swedish National Infrastructure for  
590 Computing (SNIC) at Uppmax, partially funded by the Swedish Research Council  
591 through grant agreement no. 2018-05973.

592

593

594

## References

595

596

597

598

599

600

601

602

603

604

605

606

607

608

609

610

611

612

613

614

615

616

617

618

619

620

621

622

623

624

625

1. N. Barton, J. Hermisson, M. Nordborg, Population genetics: Why structure matters. *Elife* **8**, e45380 (2019).
2. D. Lawson *et al.*, Is population structure in the genetic Biobank era irrelevant, a challenge, or an opportunity? *Human Genetics* **139**(1), 23–41 (2020).
3. G.S. Bradburd, G.M. Coop, P.L. Ralph, Inferring continuous and discrete population genetic structure across space. *Genetics* **210**(1), 33–52 (2018).
4. A. Diaz-Papkovich, L. Anderson-Trocme, C. Ben-Eghan, S. Gravel, UMAP reveals cryptic population structure and phenotype heterogeneity in large genomic cohorts. *PLoS Genetics* **15**(11), e1008432 (2019).
5. U. Lagercrantz, N. Ryman, Genetic structure of Norway spruce (*Picea abies*): Concordance of morphological and allozymic variation. *Evolution* **44**(1), 38–53 (1990)
6. G. Bucci, G.G. Vendramin, Delineation of genetic zones in the European Norway spruce natural range: preliminary evidence. *Molecular Ecology* **9**(7), 923–34 (2000).
7. J. Chen *et al.*, Disentangling the roles of history and local selection in shaping clinal variation of allele frequencies and gene expression in Norway spruce (*Picea abies*). *Genetics* **191**(3), 865–81 (2012).
8. J. Chen *et al.*, Genomic data provide new insights on the demographic history and the extent of recent material transfers in Norway spruce. *Evolutionary Applications* **12**(8), 1539–51 (2019).
9. Z. Fagernäs, Biogeography of Norway spruce (*Picea abies* (L.) Karst.): Insights from a genome-wide Study. MSc Thesis Umeå University (2017).

- 626  
627  
628  
629  
630  
631  
632  
633  
634  
635  
636  
637  
638  
639  
640  
641  
642  
643  
644  
645  
646  
647  
648  
649  
650  
651  
652  
653  
654  
655  
656  
657  
658  
659  
660  
661  
662  
663  
664  
665  
666  
667  
668  
669  
670  
671  
672  
673  
674  
675
10. M. Heuertz, *et al.*, Multilocus patterns of nucleotide diversity, linkage disequilibrium and demographic history of Norway spruce [*Picea abies* (L.) Karst]. *Genetics* **174**(4), 2095–2105 (2006).
  11. M.M. Tollefsrud *et al.*, Combined analysis of nuclear and mitochondrial markers provide new insight into the genetic structure of North European *Picea abies*. *Heredity* **102**(6), 549–62 (2009).
  12. M.M. Tollefsrud *et al.*, Genetic Consequences of Glacial Survival and Postglacial Colonization in Norway Spruce: Combined Analysis of Mitochondrial DNA and Fossil Pollen. *Molecular Ecology* **17**(18), 4134–50 (2008).
  13. M.M. Tollefsrud, M. Latałowa, W.O. van der Knaap, C. Brochmann, C. Sperisen, Late Quaternary history of North Eurasian Norway spruce (*Picea abies*) and Siberian spruce (*Picea obovata*) Inferred from macrofossils, pollen and cytoplasmic DNA. *Journal of Biogeography* **42**(8), 1431–42 (2015).
  14. Y. Tsuda *et al.*, The extent and meaning of hybridization and introgression between Siberian spruce (*Picea obovata*) and Norway spruce (*Picea abies*): Cryptic refugia as stepping stones to the West? *Molecular Ecology* **25**(12), 2773–89 (2016).
  15. G.G. Vendramin *et al.*, Chloroplast microsatellite analysis reveals the presence of population subdivision in Norway spruce (*Picea abies* K.). *Genome* **43**(1), 68–78 (2000).
  16. X. Wang, C. Bernhardsson, P.K. Ingvarsson, Demography and natural selection have shaped genetic variation in the widely distributed conifer Norway spruce (*Picea abies*). *Genome Biology and Evolution* **12**(2), 3803–17 (2020).
  17. E. Nakvasina, N. Demina, N. Prozherina, N. Demidova, Assessment of phenotypic plasticity of spruce species *Picea abies* (L.) Karst. and *P. obovata* (Ledeb.) on provenances tests in European North of Russia. *Central European Forestry Journal* **65**(2), 121–28 (2019).
  18. P. Milesi *et al.*, Assessing the potential for assisted gene flow using past introduction of Norway spruce in Southern Sweden: Local adaptation and genetic basis of quantitative traits in trees. *Evolutionary Applications* **12**(10), 1946–59 (2019).
  19. O. Savolainen, T. Pyhäjärvi, T. Knürr, Gene flow and local adaptation in trees. *Annual Review of Ecology, Evolution, and Systematics* **38**, 595–619 (2007).
  20. J. Chen *et al.*, Clinal Variation at Phenology-related genes in spruce: Parallel evolution in FTL2 and Gigantea? *Genetics* **197**(3), 1025–38 (2014).
  21. Z.-Q. Chen *et al.*, Leveraging breeding programs and genomic data in Norway spruce (*Picea Abies* L. Karst) for GWAS analysis. *Genome Biology* **22**(1), 1–30 (2021).
  22. S. Yeaman, M.C. Whitlock, The genetic architecture of adaptation under migration–selection balance. *Evolution* **65**(7), 1897–1911 (2011).
  23. S. Yeaman, Genomic rearrangements and the evolution of clusters of locally adaptive loci. *Proceedings of the National Academy of Sciences* **110**(19), E1743–51 (2013).

676

- 677 24. A. Diaz-Papkovich, L. Anderson-Trocme, C. Ben-Eghan, S. Gravel, UMAP reveals cryptic  
678 population structure and phenotype heterogeneity in large genomic cohorts. *Plos*  
679 *Genet* **15**, e1008432 (2019).  
680
- 681 25. D.H. Alexander, J. Novembre, K. Lange. Fast model-based estimation of ancestry in un-  
682 related individuals. *Genome Research* **19**(9), 1655–64 (2009).  
683
- 684 26. D. Petkova, J. Novembre, M. Stephens, Visualizing spatial population structure with Esti-  
685 mated Effective Migration Surfaces. *Nature Genetics* **48**(1), 94–100 (2015).  
686
- 687 27. F. Rousset, Genetic differentiation and estimation of gene flow from F-statistics under iso-  
688 lation by distance. *Genetics* **145**(4), 1219–28 (1997).  
689
- 690 28. C. Fraïsse *et al.*, DILS: Demographic inferences with linked selection by using ABC. *Mo-*  
691 *lecular Ecology Resources* <https://doi.org/10.1111/1755-0998.13323> (2021).  
692
- 693 29. T. Günther, G. Coop. Robust identification of local adaptation from allele frequencies. *Ge-*  
694 *netics* **196**(1), 205–20 (2013).  
695
- 696 30. K. Luu, E. Bazin, M.G. Blum, Pcadapt: An R Package to perform genome scans for selec-  
697 tion based on Principal Component Analysis. *Molecular Ecology Resources* **17**(1), 67–77  
698 (2017).  
699
- 700 31. K. Caye, B. Jumentier, J. Lepeule, O. François, LFMM 2: Fast and accurate inference of  
701 gene-environment associations in genome-wide studies. *Molecular Biology and Evolution*  
702 **36**(4), 852–60 (2019).  
703
- 704 32. B. Nystedt *et al.*, The Norway spruce genome sequence and conifer genome evolution.  
705 *Nature* **497**(7451), 579–84 (2013).  
706
- 707 33. C. Bernhardsson *et al.*, An ultra-dense haploid genetic map for evaluating the highly frag-  
708 mented genome assembly of Norway spruce (*Picea Abies*). *G3 Genes|Genomes|Genet-*  
709 *ics* **9**(5), 1623–32 (2019).  
710
- 711 34. K. Johannesson, A. L. Moan, S. Perini, C. André, A Darwinian laboratory of multiple  
712 contact zones. *Trends Ecol Evol* **35**, 1021–1036 (2020).
- 713
- 714 35. T. Giesecke, K.D. Bennett, The Holocene spread of *Picea Abies* (L.) Karst. in Fen-  
715 noscandia and adjacent areas. *Journal of Biogeography* **31**(9), 1523–48 (2004).  
716
- 717 36. H.A. Binney *et al.*, Vegetation of Eurasia from the Last Glacial Maximum to present: Key  
718 biogeographic patterns. *Quaternary Science Reviews* **157**, 80–97 (2017).  
719
- 720 37. H.A. Binney *et al.*, The Distribution of Late-Quaternary woody taxa in Northern Eurasia:  
721 Evidence from a new macrofossil database. *Quaternary Science Reviews* **28**(23–24),  
722 2445–64 (2009).

723

724

725

726

727

728

729

730

731

732

733

734

735

736

737

738

739

740

741

742

743

744

745

746

747

748

749

750

751

752

753

754

755

756

757

758

759

760

761

762

763

764

765

766

767

768

769

770

771

772

773

774

775

38. D. Lehsten *et al.*, Modelling the Holocene migrational dynamics of *Fagus Sylvatica* L. and *Picea Abies* (L.) H. Karst. *Global Ecology and Biogeography* **23**(6), 658–68 (2014).
39. M. Latalowa, W.O. van der Knaap, Late Quaternary expansion of Norway spruce *Picea abies* (L.) Karst. in Europe according to pollen data. *Quaternary Science Reviews* **25**(21–22), 2780–2805 (2006).
40. G. Eriksson, I. Ekberg, An introduction to forest genetics. Swedish University of Agricultural Sciences (2001).
41. T. Günther *et al.*, Population genomics of Mesolithic Scandinavia: Investigating early postglacial migration routes and high-latitude adaptation. *PLoS Biology* **16**(1), e2003703 (2018).
42. B.M. Peter, D. Petkova, J. Novembre, Genetic landscapes reveal how human genetic diversity aligns with geography. *Molecular Biology and Evolution* **37**(4), 943–51 (2020).
43. G. Hewitt, The genetic legacy of the Quaternary Ice Ages. *Nature* **405**(6789), 907–13 (2000).
44. D. De Carvalho *et al.*, Admixture facilitates adaptation from standing variation in the European aspen (*Populus Tremula* L.), a widespread forest tree. *Molecular Ecology* **19**(8) 1638–50 (2010).
45. S.C. Bray *et al.*, Ancient DNA identifies post-glacial recolonisation, not recent bottlenecks, as the primary driver of contemporary MtDNA phylogeography and diversity In Scandinavian brown bears. *Diversity and Distributions* **19**(3), 245–56 (2013).
46. M. Jaarola, H. Tegelström, K. Fredga, Colonization history in Fennoscandian rodents. *Biological Journal of the Linnean Society* **68**(1–2), 113–27 (1999).
47. J. Wang *et al.*, A major locus controls local adaptation and adaptive life history variation in a perennial plant. *Genome Biology* **19**(1), 1–17 (2018).
48. P. Androsiuk *et al.*, Genetic status of Norway spruce (*Picea abies*) breeding populations for Northern Sweden. *Silvae Genetica* **63**(2), 127 (2013).
49. M.A. Polezhaeva, M. Lascoux, V.L. Semerikov, Cytoplasmic DNA variation and biogeography of *Larix* Mill. in Northeast Asia. *Molecular Ecology* **19**(6), 1239–52 (2010).
50. L. Schulte *et al.*, Hybridization capture of larch (*Larix* Mill.) chloroplast genomes from sedimentary ancient DNA reveals past changes of Siberian forest. *Molecular Ecology* **21**(3), 801–15 (2021).
51. V.L. Semerikov *et al.*, Southern montane populations did not contribute to the recolonization of West Siberian Plain by Siberian larch (*Larix sibirica*): A range-wide analysis of cytoplasmic markers. *Molecular Ecology* **22**(19), 4958–71 (2013).
52. N.V. Semerikov *et al.*, Cytoplasmic DNA variation does not support a recent contribution of *Pinus sylvestris* L. from the Caucasus to the main range. *Tree Genetics & Genomes* **16**(4), 1–11 (2020).

- 776 53. T. Giesecke, Holocene dynamics of the Southern boreal forest in Sweden. *The Holocene*  
777 **15**(6), 858–72 (2005).  
778
- 779 54. L. Kullman, Norway Spruce present in the Scandes Mountains, Sweden at 8000 BP: New  
780 light on Holocene tree spread. *Global Ecology and Biogeography Letters* **5**(2), 94–101  
781 (1996).  
782
- 783 55. U. Herzschuh, Legacy of the Last glacial on the present-day distribution of deciduous ver-  
784 sus evergreen boreal forests. *Global Ecology and Biogeography* **29**(2), 198–206 (2020).  
785
- 786 56. M. Hannerz, Genetic and seasonal variation in hardiness and growth rhythm in boreal  
787 and temperate conifers—a review and annotated bibliography. Report. Skogforsk (1998).  
788
- 789 57. D. Grattapaglia, *et al.*, Quantitative genetics and genomics converge to accelerate forest  
790 tree breeding. *Frontiers in plant science* **9**, 1693 (2018).
- 791
- 792 58. A. Vidalis *et al.*, Design and evaluation of a large sequence-capture probe set and asso-  
793 ciated SNPs for diploid and haploid samples of Norway spruce (*Picea abies*). *bioRxiv*  
794 [Preprint] (2018). <https://www.biorxiv.org/content/10.1101/291716v1> (accessed 1 Novem-  
795 ber 2021).  
796
- 797 59. H. Li, R. Durbin, Fast and accurate long-read alignment with Burrows–Wheeler Trans-  
798 form. *Bioinformatics* **26**(5), 589–95 (2010).  
799
- 800 60. C.C. Chang *et al.*, Second-Generation PLINK: Rising to the challenge of larger and richer  
801 datasets. *GigaScience* **4**(1), 7 (2015).  
802
- 803 61. K.J. Galinsky *et al.*, Fast Principal-Component Analysis reveals convergent evolution of  
804 ADH1B in Europe and East Asia. *The American Journal of Human Genetics* **98**(3), 456–  
805 72 (2016).  
806
- 807 62. R.R. Hudson, M. Slatkin, W.P. Maddison, Estimation of levels of gene flow from DNA se-  
808 quence data. *Genetics* **132**(2), 583–89 (1992).  
809
- 810 63. G. Coop, D. Witonsky, A. Di Rienzo, J.K. Pritchard, Using environmental correlations to  
811 identify loci underlying local adaptation. *Genetics* **185**(4), 1411–23 (2010).  
812
- 813 64. F. Privé, K. Luu, B.J. Vilhjálmsson, M.G. Blum, Performing highly efficient genome scans  
814 for local adaptation with R Package Pcadapt Version 4. *Molecular Biology and Evolution*  
815 **37**(7), 2153–54 (2020).  
816
- 817 65. A. Alexa, J. Rahenfuhrer, TopGO: Enrichment analysis for gene ontology. *Bioconductor*  
818 *Improv*, **27**, 1-26 (2009).  
819
- 820 66. M. Tiret, P. Milesi, Statistical Peak Detection for GWAS. Zenodo.  
821 <https://doi.org/10.5281/zenodo.5079556>. Deposited 7 July 2021.  
822  
823  
824



825  
826  
827  
828  
829

## Figures and Tables

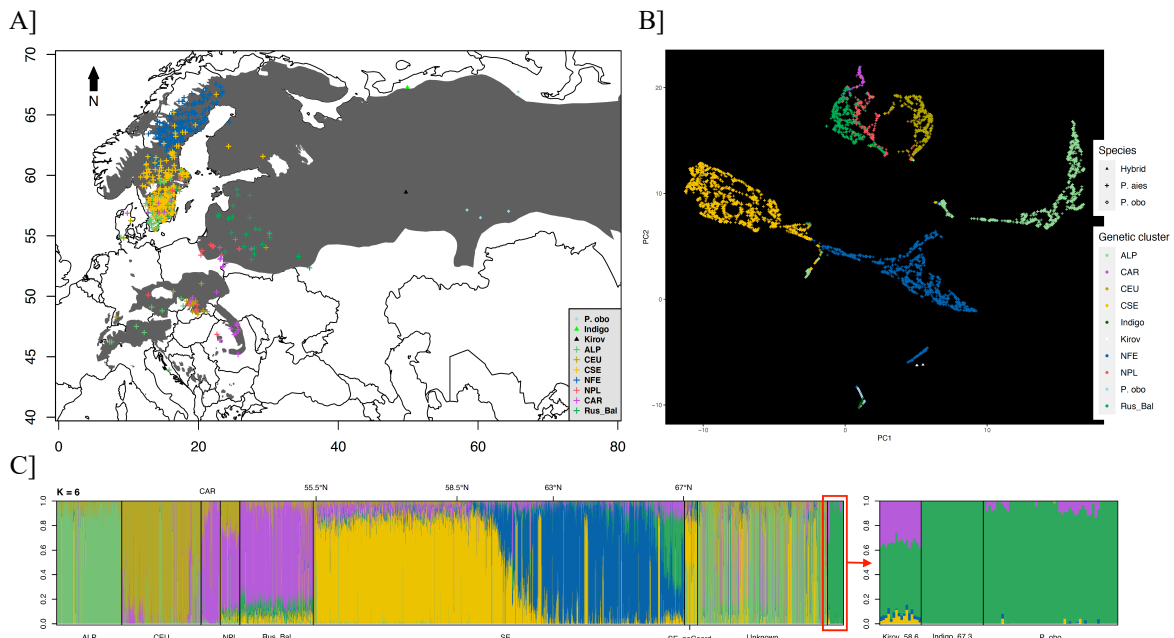

830  
831  
832  
833  
834  
835  
836  
837  
838  
839  
840  
841

**Figure 1: Population genetic structure of *P. abies*.** **A)** Sampling location of *P. abies* (plus signs: light green, Alpine (ALP); brown, Central Europe (CEU); purple Carpathian (CAR); red, northern Poland (NPL); dark green Russia-Baltics (Rus\_Bal); yellow, southern Fennoscandia (CSE) and dark blue, northern Fennoscandia (NFE), *P. obovata* (diamonds, light blue) and hybrids (Indigo and Kirov) (black triangles). The shaded area corresponds to the distribution range of *P. abies* and *P. obovata* **B)** UMAP bi-dimensional plots, colors are the same as for panel A. **C)** Admixture plot for K= 6. Samples from a same geographic origin were grouped. Swedish samples were ordered by latitude. Colors represent different ancestry components.

842  
843  
844  
845  
846  
847  
848  
849  
850  
851

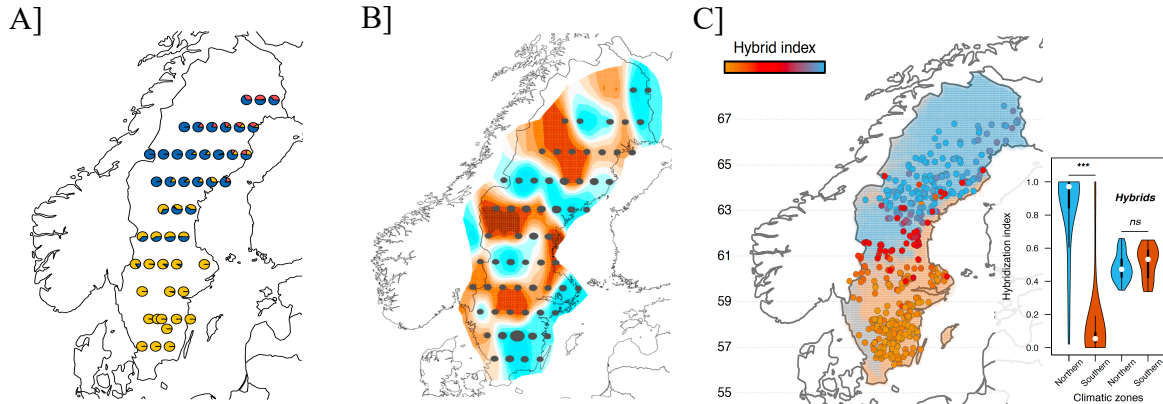

852  
853  
854  
855  
856  
857  
858  
859  
860  
861  
862  
863  
864  
865  
866  
867

**Figure 2: Fine genetic structure of the contact zone and relation to climate zones.**

**A)** Admixture proportions based on the best spatial model using *conStruct* (K = 3). Colors represent different ancestry components. Close-by samples were grouped into “populations”. **B)** Estimated effective migration surfaces (EEMS). Blue and brown areas respectively indicate regions with a higher or a lower effective migration rate than expected under a model of isolation by distance (IBD). Gray dots represent individual aggregations. **C)** The genetic contact zone overlaps with the transition between the two main climatic zones, the southern one (orange background) and the northern one (blue background). Dots represent tree locations and the color scale corresponds to the hybridization level (from 0, full CSE, orange, to 1, full NFE, blue). Violin plots represent the distribution of hybrid index within each of the two main climatic zones (all samples or only samples with  $0.33 > \text{hybrid index} < 0.66$ ; <sup>ns</sup>,  $p > 0.05$ ; <sup>\*\*\*</sup>,  $p < 0.001$ ).

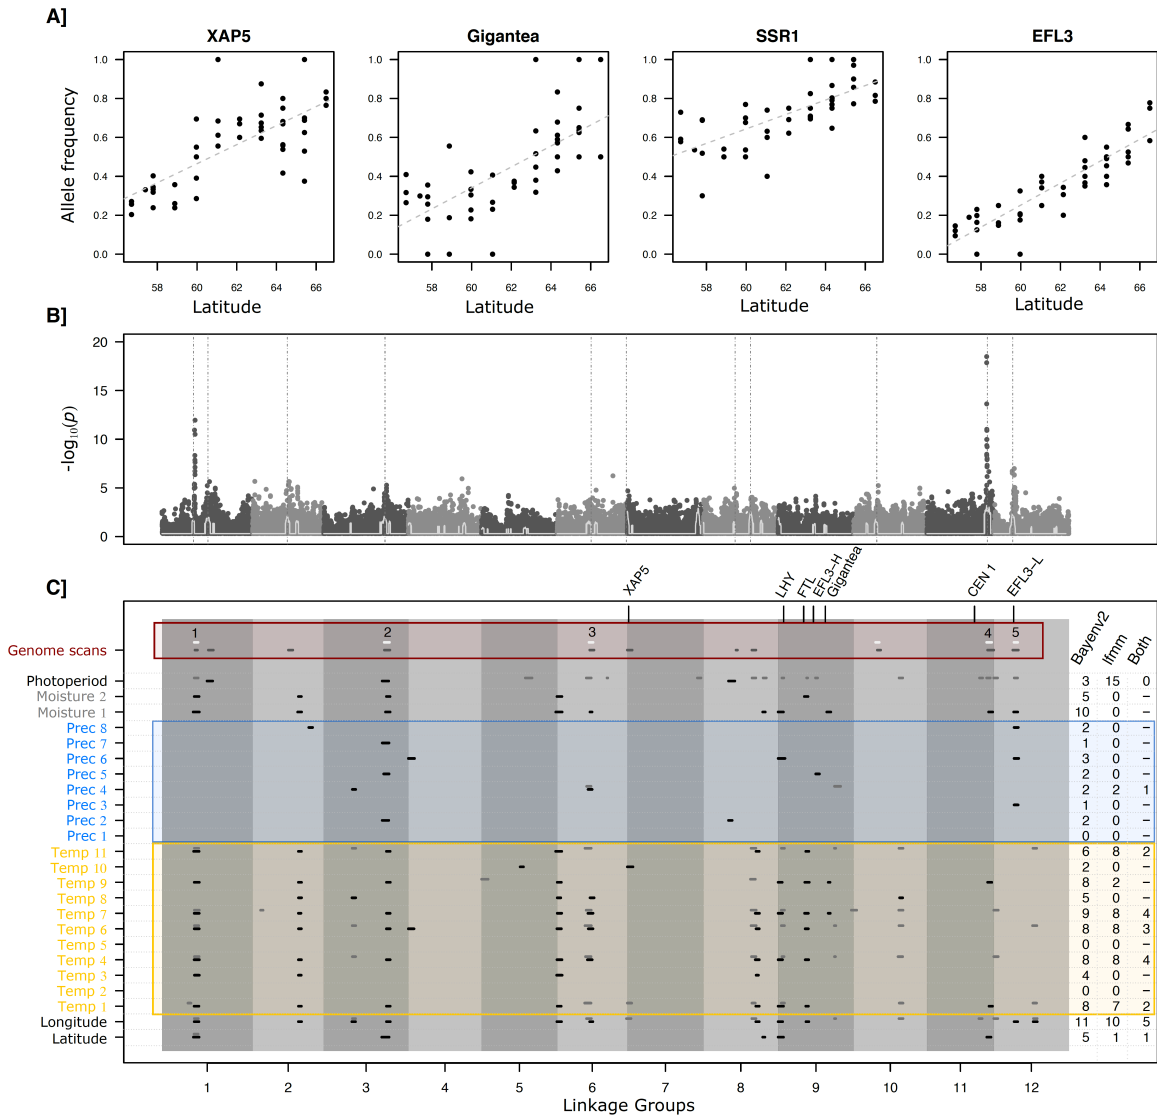

868  
869

870 **Figure 3: Genome scans for differentiation outliers and genotype-environment as-**  
 871 **sociation (GEA). A)** Examples of allele frequency variation as a function of latitude for  
 872 four candidate genes involved in the control of the circadian clock. **B)** Manhattan plot ( $-\log_{10} p$ -values) of genome scan for excess of differentiation (*pcAdapt*). Dark and light grey  
 873 backgrounds delineate linkage groups. Vertical dotted grey lines represent regions enriched for low  $p$ -values, “peaks” in the profile. A detailed analysis is provided for each of  
 874 the genome scan and GEA in Supplementary material 3. **C)** For each genome scan (white,  $X^T X$ ; grey, *pcAdapt*) and genotype-environment-association (black, *Bayenv2*; dark grey,  
 875 *lfrmm2*) significant peaks are localized on the Norway spruce genetic map. For each geo-  
 876 graphic and bioclimatic variable, the number of significant peaks is indicated on the right  
 877 as well as the number of shared peaks. Numbers at the top of the graph identify significant  
 878 peaks detected by the two genome scans methods and at least one GEA method. When  
 879 possible, genes involved in the control of circadian clock were placed onto the genetic  
 880 map.  
 881  
 882  
 883  
 884

| <b>Distance to contact zone</b> | <b>AM vs SI</b>   | <b>IM vs SC</b>   | <b>M-homo vs M-hetero</b> | <b>N<sub>e</sub>-homo vs N<sub>e</sub>-hetero</b> |
|---------------------------------|-------------------|-------------------|---------------------------|---------------------------------------------------|
| close                           | AM ( $p = 1.00$ ) | IM ( $p = 0.52$ ) | M-homo ( $p = 0.89$ )     | N-hetero ( $p = 0.88$ )                           |
| intermediate                    | AM ( $p = 1.00$ ) | IM ( $p = 0.49$ ) | M-homo ( $p = 0.95$ )     | N-hetero ( $p = 0.93$ )                           |
| far                             | AM ( $p = 1.00$ ) | IM ( $p = 0.55$ ) | M-homo ( $p = 0.89$ )     | N-hetero ( $p = 0.71$ )                           |

885

886 **Table 1: Pairwise comparison of different models with DILS for individuals at varying**

887 **distance from the center of the contact zone.** Demographic models: Strict Isolation (SI),

888 Ancient Migration (AM), Isolation with Migration (IM), Secondary Contact (SC), Homoge-

889 neous and Heterogeneous migration ( $Nm$ ) (M-homo and M-hetero), and Homogeneous

890 and Heterogeneous effective population size ( $N_e$ ) (N<sub>e</sub>-homo and N<sub>e</sub>-hetero). The value

891 within parentheses,  $p$ , is the posterior probability of the best demographic model. Dis-

892 tance to contact zone is defined according to the hybrid index.

893

894 **Online methods**

895

896 **Sample collection:** The study was based on 4769 spruce trees, originating mainly  
897 from the Swedish Norway spruce (*P. abies*) breeding base population (Figure 1).  
898 Among them, 162 individuals were collected in natural populations across the Nor-  
899 way spruce natural distribution range (40 individuals from the hybrid zone between  
900 *P. abies* and *P. obovata*, 69 pure *P. abies* and 53 pure *P. obovata*) (8). The re-  
901 maining trees (4607) were “plus” trees (trees of outstanding phenotype) sampled  
902 in Skogforsk (The Forestry Research Institute of Sweden) plantations across Swe-  
903 den. A total of 873 of those trees lacked geographic information on their origin  
904 (Table S1). All trees were genotyped ((8), BioProject PRJNA511374 and (21), Bi-  
905 oProject PRJNA731384) using an exome capture target re-sequencing strategy  
906 (40,018 diploid probes with 20bp-length were designed to capture 26,219 *P. abies*  
907 genes, (58)).

908 **Single Nucleotide Polymorphism calling:** Raw reads were mapped to the *P.*  
909 *abies* genome reference v1.0 (32) using BWA-MEN algorithm with default param-  
910 eters (67). PCR duplicates were removed using SAMTOOLS v.1.2 (68) and Picard  
911 v1.141 (<http://broadinstitute.github.io/picard>), and INDELS were realigned using  
912 GATK v3-5.0 (62). Individual variants were identified using HaplotypeCaller v.3.6  
913 (69) and individual g.vcf were merged using CombineGVCFs v.3.5.0. Variant qual-  
914 ity score recalibration (VQSR) was applied following the same procedure as in  
915 (70). We additionally filtered SNPs according to four criteria. SNPs were removed  
916 if at least one of the following conditions was met: (i) Root Mean Square of the  
917 mapping quality (MQ) < 40; (ii) Allele depth (AD) < 2; (iii) genotyping coverage  
918 across individuals < 20% and (iv) the site has more than two alleles. Individuals  
919 with more than 50% missing data were also removed (N = 282).

920 The filtered dataset included 4508 individuals and 504,110 SNPs. Those  
921 SNPs were annotated based on the most recent genome annotation available for  
922 *P. abies* (v1.0, <http://congenie.org/>): 205,337 (41%) SNPs are within introns,  
923 108,300 (21%) are in intergenic regions and 190,463 are in the exons (38%) of  
924 which 63% are synonymous variants (24% of total SNPs) and 37% are nonsynon-  
925 ymous variants (14% of total SNPs).

926 **Population structure and genotype assignment:** For population structure anal-  
927 yses, sites in high linkage disequilibrium ( $r^2 > 0.2$ ) as well as singletons were re-  
928 moved using PLINK v.1.9 (60). Among the remaining SNPs, 155,211 putatively  
929 neutral SNPs (i.e. within introns and intergenic regions) were kept for demographic  
930 analyses.

931 *Principal component analysis.* We first conducted a principal component analysis  
932 (PCA) using EIGENSOFT with default parameters (v.7.2.0,  
933 <https://github.com/DreichLab/EIG>, (61). We then subset the dataset to insure even  
934 number of individuals (N = 80) in the different genetic clusters and re-ran the PCA.  
935 The procedure was repeated eight times and a similar clustering was obtained in  
936 all runs (SI Appendix, Figure S1).

937 *Genotype assignment.* The same Random Forest classification procedure as in (8)  
938 was then used to infer the geographic origins of the 873 trees whose geographic  
939 coordinates were unknown. The assignment was based on genotype similarity on  
940 the first five principal components of the PCA (“Random Forest” classification  
941 model in R version 3.5.3, ‘*randomForest*’ v.4.6-14 package (74,75). The 2572 *P.*  
942 *abies* trees with documented geographical origins and falling in the center of each  
943 genetic cluster in the PCA were used as training set. The procedure was repeated  
944 200 times with 8000 iterations to estimate the accuracy of each assignment. If a  
945 tree was assigned to the same genetic cluster more than 98% times, it was con-  
946 sidered as belonging to that genetic cluster.

947 *Model-based clustering.* We first estimated population structure using the unsu-  
948 pervised genetic clustering algorithms implemented in ADMIXTURE v1.3 (25) with  
949 ten-fold cross validation and 200 bootstraps. The K-value with the lowest cross  
950 validation error was retained as the “best” number of theoretical ancestral clusters,  
951 but we also reported the results for K varying from 2 to “best-K”+1 as identifying  
952 the “true” number of clusters remains an elusive problem (3,76). As for PCA, the  
953 whole analysis was repeated on subsets with even number of individuals randomly  
954 sampled in each of *P. abies* genetic cluster.

955  $F_{ST}$  estimates. Pairwise fixation indices (Hudson's estimator of  $F_{ST}$ , (62)) were then  
956 estimated between *P. obovata*, admixed *P. abies* x *P. obovata* populations and the  
957 *P. abies* genetic clusters defined through the PCA analysis.

958

959 For the following analyses, only trees that were of confirmed Swedish origin (base  
960 on genetic clustering) and with known geographic coordinates were considered (N  
961 = 1758). We filtered the SNPs dataset to remove loci with > 50% missing geno-  
962 types, newly-generated invariant sites and singletons. We retained 113,748 un-  
963 linked putatively neutral SNPs (from introns and intergenic regions).

964

### 965 **Spatialized analyses of genetic variation of Norway spruce across Sweden**

966 The Swedish *P. abies* populations are, by and large, continuously distributed and  
967 there is a high level of long-distance gene flow (77). To consider both discrete  
968 clusters and continuous distribution of the genetic variation of Norway spruce  
969 across Sweden, we used the *conStruct* software v. 1.03 (3) that combines model-  
970 based clustering algorithms with an isolation by distance model. The 1758 geo-  
971 referenced samples with genetic Swedish origin were assigned to 47 populations.  
972 These "artificial populations" were defined by grouping trees from close geographic  
973 origins (N > 5). We ran *conStruct* using K = 1 to K = 7 for one chain and each with  
974 100,000 Markov chain Monte Carlo (MCMC) iterations, and compared spatial and  
975 nonspatial models using cross validation across 10 replicates.

### 976 **Isolation-by-distance and identification of barriers to gene flow:**

977 *Estimating effective migration surfaces.* To identify corridors or barriers to gene  
978 flow, we used EEMS software (v. 0.0.9000 (26)). It estimates effective migration  
979 surfaces (EEMS) from geographically indexed samples. Sample coordinates and  
980 pairwise genetic dissimilarity were used to identify regions with faster or slower  
981 change in genetic similarities than predicted under an isolation by distance model.  
982 The overall Norway spruce habitat in Sweden was divided into triangular grids cor-  
983 responding to different deme numbers (30, 50, 80 and 100). Each sample was  
984 assigned to the closest point on the grid. To test the stability of the results the  
985 program was run five times with 10,000,000 MCMC iterations and 5,000,000 burn-

986 ins for each deme size. Following authors guideline, we combined estimates over  
987 different grids.

988

989 *Isolation by distance estimation through  $F_{ST}$ .* We also quantified the pattern of iso-  
990 lation by distance by regressing a function of  $F_{ST}$  (27) over the logarithm of the  
991 distance between pairs of populations (we used the same populations as those  
992 defined for the *conStruct* analysis):

993 
$$\frac{F_{ST_i}}{(1-F_{ST_i})} = \beta \cdot \ln(x_i) + \alpha + \varepsilon_i \text{ [eq.1]}$$

994

995 For each pair of sub-populations  $i$ ,  $F_{ST_i}$  was estimated using *vcftools* (v0.1.13, (74)),  
996  $x_i$  is the geodesic distance separating a pair of populations (in km, “geosphere” R  
997 package v1.5-10, (81)),  $\beta$  is the slope of the regression,  $\alpha$  is the intercept and  $\varepsilon_i$  is  
998 the error term. According to (27), independently of the scale, the slope is inversely  
999 proportional to the product of population density  $D$ , by the second moment of dis-  
1000 persal distance  $\sigma^2$ :  $\beta = 1/(4\pi D\sigma^2)$ . In Sweden Norway spruce distribution is al-  
1001 most continuous and an even density can be assumed. The “slope” estimate  
1002  $4\pi D\sigma^2$  can thus be interpreted as a neighborhood size, individuals within a neigh-  
1003 borhood mating randomly.

1004

#### 1005 **The contribution of linked selection to the contact zone.**

1006

1007 In order to test whether linked selection contributed to the establishment and  
1008 maintenance of the contact zone, we used the program *DILS* (28). Briefly, *DILS*  
1009 implements single-population and two-population demographic models and identi-  
1010 fies the most likely demographic scenario with and without linked selection. In the  
1011 case of two-population models that diverged  $T$  generations back, four demographic  
1012 models are possible, namely Strict Isolation (SI), Ancient Migration (AM), Isolation  
1013 with Migration (IM) and Secondary Contact (SC). The effect of linked selection is  
1014 estimated through its effect on the distribution of the effective population size,  $N_e$ ,  
1015 or the effective migration rate,  $Nm$ , along the genome. *DILS* uses Approximate



1016 Bayesian Computations (ABC) and computes summary statistics on the real da-  
1017 taset (nucleotide diversity  $\pi$ , Tajima's D, Watterson's theta, and summary statistics  
1018 approximating the joint Site Frequency Spectrum), and compare them to a pre-  
1019 simulated reference table made of 10,000 simulations of 1,000 loci for each demo-  
1020 graphic scenario. Model comparison is then done with a random forest of 1,000  
1021 trees. An error rate per decision tree ( $e$ ) is estimated, and the posterior probability  
1022 is computed as  $1-e$ . The population growth was considered constant, mutation rate  
1023 fixed to  $2.763 \cdot 10^{-8}$ , and priors with a log-Uniform distribution for effective popula-  
1024 tion size (from 100 to 500,000), time of split (from 100 to 1,750,000 generations),  
1025 and effective migration rate (from 0.4 to 40). Considering that distance to the con-  
1026 tact zone might influence demographic inferences (e.g., hybrids have different his-  
1027 tory than pure individuals), we created three different datasets of 20 individuals (10  
1028 from NFE and 10 from CSE) as inputs for *DILS* depending on the distance to the  
1029 contact zone. Distance to the contact zone was expressed in terms of hybrid index,  
1030 the center of the contact zone being arbitrarily defined as the location where the  
1031 hybrid index is 0.5. The dataset "far" comprised individuals with a hybrid index  
1032 lower than 0.04 or higher than 0.96; the dataset "intermediate" comprised individ-  
1033 uals with a hybrid index between 0.14 and 0.36 or between 0.64 and 0.87; finally,  
1034 the dataset "close" comprised individuals with a hybrid index between 0.37 and  
1035 0.63. Individuals of each dataset were randomly sampled from the respective  
1036 range of hybrid index. Following software guidelines, a subset of coding regions  
1037 was used: 1708 coding regions, corresponding to 1% of the exome (from 500 ran-  
1038 domly sampled scaffolds).

1039

1040 **Abiotic environment characterization and climatic zones definition:** To as-  
1041 sess whether the contact zone between the main genetic clusters corresponded to  
1042 a shift in abiotic conditions across Sweden, we defined climatic zones based on  
1043 19 bioclimatic records (Chelsa database v1.2, <http://chelsa-climate.org/>, 30 arc-  
1044 second resolution) using an unsupervised clustering approach (i.e. without any *a*  
1045 *priori*). Values for each bioclimatic variable were extracted for each geographic  
1046 coordinate corresponding to land in Sweden and to a grid with nodes every 0.1

1047 degree of latitude and longitude. A principal component analysis was carried out  
1048 on these data (“PCA” function, R package “*FactoMineR*” v1.42, (83)) followed by  
1049 a hierarchical ascendant clustering approach (“HCPC” function, R package “*Fac-*  
1050 *toMineR*”). The optimal number of clusters ( $Q_{opt}$ ) was defined based on the inertia  
1051 ( $I$ ) growth between increasing number of clusters ( $q$ ):

$$1052 \quad Q_{opt} = \min \left( \frac{I_{q-1} - I_q}{I_q - I_{q+1}} \right) \text{ eq.2}$$

### 1053 **Testing for local adaptation**

1054 Different approaches were used to test for the presence of local adaptation at the  
1055 genomic level and to detect association between genomic polymorphisms and en-  
1056 vironmental variables. In line with our analysis of population structure we used two  
1057 types of approaches. The first family of methods assumes the presence of popu-  
1058 lations ( $n_{pop} = 47$ ) and uses the pattern of allele frequencies within and between  
1059 these populations to make inference on natural selection or identify genomic areas  
1060 associated to environmental variation. In contrast, methods from the second group  
1061 are based on individuals and do not require the *a priori* clustering of individuals  
1062 into a finite number of populations. The same genomic dataset was used for all  
1063 subsequent analyses and all SNPs (including also coding sites), with a minimum  
1064 allele frequency (MAF) higher than 0.05 and less than 50% missing data were kept  
1065 ( $n_{SNP} = 142,766$ ).

1066 **Detecting excess of differentiation:** We used the *Bayenv2* software (41,83) to  
1067 compute the  $X^T X$  statistic, an analogue to  $F_{ST}$  based on standardized allele fre-  
1068 quencies corrected for population structure. To compute the covariance matrix of  
1069 allele frequencies across the 47 populations, 20 sets of 8,000 non-coding and un-  
1070 linked loci were randomly selected from the same dataset as the one used in the  
1071 *conStruct* analysis. The covariance matrix was obtained by averaging over the last  
1072 matrices generated by the 20 independent runs of 100,000 MCMC iterations. Only  
1073 SNPs with a  $X^T X$  higher than  $\overline{X^T X} + 3 \cdot SD$  where SD is the standard deviation of the  
1074  $X^T X$  distribution were considered significant ( $> 0,993$  quantile).

1075 We also used a PCA-based outlier detection method implemented in the “*pcAdapt*”  
1076 v4.3.2 R package (30,84). The method assumes that the main part of the SNPs

1077 variation along principal component axes reflects demographic processes and  
1078 population structure. Extreme values correspond to outliers SNPs that are pre-  
1079 sumed to be in the vicinity of SNPs involved in adaptation. To ensure that the ob-  
1080 served pattern is not driven by a small region with extended linkage disequilibrium,  
1081 PCA loadings were checked. To control for false positives, only SNPs with FDR  $q$ -  
1082 value  $< 0.1$  were considered as putatively involved in local adaptation.

1083 **Genotype-environment associations:** In order to further characterize the genetic  
1084 basis of local adaption in Norway spruce, we conducted genotype-environment  
1085 associations (GEAs). As for the detection of excess of differentiation, we used two  
1086 different approaches, one population-based, “*Bayenv2*” and one individual-based,  
1087 “*lmm2*” (30). The same 19 Chelsa bioclimatic variables as those used to define  
1088 the climatic zone were used for each tree location. Three additional climatic varia-  
1089 bles were computed: (i) annual heat-moisture index (AHM, annual mean tempera-  
1090 ture / (total annual precipitations/100)), (ii) summer heat-moisture index (SHM, av-  
1091 erage temperatures of warmest month / (total precipitations of warmest quar-  
1092 ter/100)) and (iii) average day length difference between June and January; the  
1093 latter was used as a proxy for the growth period (SI Appendix Table S2).

1094 **Bayenv2** tests for a correlation between allele frequencies and an environmental  
1095 variable by using a Bayesian generalized linear mixed model. A variance-covari-  
1096 ance matrix of allele frequencies is incorporated as random effect to correct for  
1097 population structure. For each climatic variable plus latitude and longitude, both  
1098 Bayes Factor (BF) and Spearman's  $\rho$  correlation coefficient were computed to  
1099 measure the intensity of the association between allele frequency variation and  
1100 environmental variation. For each climatic variable, the following filtering (based  
1101 on Bayes factor and Spearman's  $\rho$ ) was applied to retain only the most relevant  
1102 SNPs: (a) the SNPs were ranked according to their Bayes factor (BF) and a SNP  
1103 was retained if i) its BF  $> 100$  (very strong strength of evidence according to (85)  
1104 or, if ii) its BF  $> 20$  (strong strength of evidence) and it was within the 0.1% highest  
1105 BF.

1106 **Latent factor mixed models** were also used to test for associations between the  
1107 set of environmental / geographic variables and SNPs variation. The “*lmm2*”

1108 function (“LEA” R package) was used to estimate latent factors based on an exact  
1109 least-squares approach. Missing genotypes were imputed using the “impute” func-  
1110 tion following author recommendations. The number of latent factors to be included  
1111 in the analysis was determined using the “*snmf*” function (MCMC, 10 repetitions,  
1112 6% of dataset masked per repetitions). It was defined as being the one minimizing  
1113 the cross-entropy criterion across all runs. The latent factors were used to correct  
1114 for population structure in linear regressions between genotypes and environmen-  
1115 tal variables; *p*-values were recalibrated by using genomic control after correction  
1116 for confounding effect from population structure (“*lfmm2.test*” function). To control  
1117 for false positives, only SNPs with a *q*-value < 0.1 were considered (“*qvalue*”  
1118 v2.20.0 R package, method “*fdr*”, Storey et al. 2020).

1119 **Candidate genes putative functions:** Gene ontology (GO) enrichment was per-  
1120 formed using the ‘topGO’ R package (v2.44.0; (86)). Annotation from ConGenIE  
1121 (the Conifer Genome Integrative Explorer, <http://congenie.org/>) was used as refer-  
1122 ence (i.e. custom input). For various lists of candidate genes, defined through both  
1123 genome-scans or GEA, enrichment of genes in particular GO terms for biological  
1124 processes (BP) was assessed using Kolmogorov-Smirnov’s tests “*elimKS*”. *rrvgo*  
1125 (87) was then used to summarize gene ontology terms by collapsing redundant  
1126 terms across hierarchical levels using *Arabidopsis thaliana* as a reference for GO  
1127 term (v.3.13.0, (88)).

1128 **Genetic map positioning of loci putatively involved in local adaptation:** About  
1129 60 % of all SNPs were successfully positioned onto the *P. abies* consensus genetic  
1130 map (33). We developed a new approach to identify regions enriched for outliers  
1131 (either low *p*-values in *pcaAdap*, and *lfmm2* analyses or high Bayes factor for  
1132 *Bayenv2*). The method (66) is described and freely accessible at  
1133 <https://github.com/mtiret/gwas-snp-detection>. For each genome scan or GEA, we  
1134 searched for regions with more outlier SNPs (top 5% of the distribution) than ex-  
1135 pected under a random distribution. In a first step, we generated a null expectation  
1136 through randomization (10,000 runs) to determine the maximum number of outliers  
1137 expected by chance within each 300 bp window. This number was then used as a  
1138 threshold for peak detection in the actual data. Finally, to be conservative, only

1139 peaks containing at least one SNP detected as significant after correction for mul-  
1140 tiple testing were considered as candidate regions.

1141  
1142  
1143

#### 1144 References

1145  
1146  
1147

67. H. Li, R. Durbin, Fast and Accurate Long-Read Alignment with Burrows–Wheeler Transform. *Bioinformatics* **26**(5), 589–95 (2010).

1148  
1149  
1150

68. H. Li *et al.*, The Sequence Alignment/Map Format and SAMtools. *Bioinformatics* **25**(16), 2078–79 (2009).

1151  
1152  
1153  
1154  
1155

69. A. McKenna *et al.*, The Genome Analysis Toolkit: A MapReduce Framework for Analyzing next-Generation DNA Sequencing Data. *Genome Research* **20**(9), 1297–1303 (2010).

1156  
1157  
1158  
1159

70. G.A. van der Auwera *et al.*, From FastQ Data to High-Confidence Variant Calls: The Genome Analysis Toolkit Best Practices Pipeline. *Current Protocols in Bioinformatics* **43**(1), 11–10 (2013).

1160  
1161  
1162  
1163

71. J. Baison *et al.*, Genome-Wide Association Study Identified Novel Candidate Loci Affecting Wood Formation in Norway Spruce. *Plant Journal* **100**(1), 83–100 (2019).

1164  
1165  
1166

72. C.C. Chang *et al.*, Second-Generation PLINK: Rising to the Challenge of Larger and Richer Datasets. *GigaScience* **4**(1), 7 (2015).

1167  
1168  
1169  
1170

73. K.J. Galinsky *et al.*, Fast Principal-Component Analysis Reveals Convergent Evolution of ADH1B in Europe and East Asia. *The American Journal of Human Genetics* **98**(3), 456–72 (2016).

1171  
1172  
1173

74. A. Liaw, M. Wiener, Classification and Regression by RandomForest. *R news* **2**(3), 18–22 (2002).

1174  
1175  
1176

75. R Core Team, R: A Language and Environment for Statistical Computing. R Foundation for Statistical Computing, Vienna Austria (2013).

1177  
1178  
1179  
1180

76. J.K. Pritchard, M. Stephens, P. Donnelly, Inference of Population Structure Using Multilocus Genotype Data. *Genetics* **155**(2), 945–59 (2000).

- 1181 77. J. Burczyk, A. Lewandowski, W. Chalupka, Local Pollen Dispersal and  
1182 Distant Gene Flow in Norway Spruce (*Picea Abies* [L.] Karst.). *Forest*  
1183 *Ecology and Management* **197**(1–3), 39–48 (2004).  
1184
- 1185 78. D. Petkova, J. Novembre, M. Stephens, Visualizing Spatial Population  
1186 Structure with Estimated Effective Migration Surfaces. *Nature Genetics*  
1187 **48**(1), 94–100 (2015).  
1188
- 1189 79. B.S. Weir, C.C. Cockerham, Estimating F-Statistics for the Analysis of  
1190 Population Structure. *Evolution* **38**(6), 1358 (1984).  
1191
- 1192 80. P. Danecek *et al.*, The Variant Call Format and VCFtools. *Bioinformatics*  
1193 **27**(15), 2156–58 (2011).  
1194
- 1195 81. R.J. Hijmans, E. Williams, C. Vennes, Geosphere: Spherical Trigonome-  
1196 try. *R package version 1.5-14*. [https://cran.r-project.org/package=geo-](https://cran.r-project.org/package=geosphere)  
1197 [sphere](https://cran.r-project.org/package=geosphere) (2021).  
1198
- 1199 82. S. Lê, J. Josse, F. Husson, FactoMineR: An R Package for Multivariate  
1200 Analysis. *Journal of Statistical Software* **25**(1), 1–18 (2008).  
1201
- 1202 83. G. Coop, D. Witonsky, A. Di Rienzo, J.K. Pritchard, Using Environmental  
1203 Correlations to Identify Loci Underlying Local Adaptation. *Genetics* **185**(4),  
1204 1411–23 (2010).  
1205
- 1206 84. F. Privé, K. Luu, B.J. Vilhjálmsson, M.G. Blum, Performing Highly Efficient  
1207 Genome Scans for Local Adaptation with R Package Pcadapt Version 4.  
1208 *Molecular Biology and Evolution* **37**(7), 2153–54 (2020).  
1209
- 1210 85. R.E. Kass, A.E. Raftery, Bayes Factors. *Journal of the American Statistical*  
1211 *Association* **90**(430): 773–95 (1995).  
1212
- 1213 86. A. Alexa, J. Rahenfuhrer, TopGO: Enrichment Analysis for Gene Ontol-  
1214 ogy. *Bioconductor Improv*, **27**, 1-26 (2009).  
1215
- 1216 87. S. Sayols, rrvgo: A Bioconductor Package to Reduce and Visualize Gene  
1217 Ontology Terms. *R package version*, <https://ssayols.github.io/rrvgo> (2020).  
1218
- 1219 88. M. Carlson, Org.At.Tair.Db: Genome Wide Annotation for Arabidopsis. R  
1220 package version 3.7.0 (2018).  
1221  
1222
